# Supplementary material for: Adoptive Transfer of Bone Marrow-Derived Monocytes Ameliorates Schistosoma mansoni -Induced Liver Fibrosis in Mice
Source: PubMed Central journal article supplement (PMC6478942; doi:10.1038/s41598-019-42703-y), 2019-04-23
Supplement: 41598_2019_42703_MOESM1_ESM.pdf [file 41598_2019_42703_MOESM1_ESM.pdf]

**Adoptive Transfer of Bone Marrow-Derived Monocytes Ameliorates *Schistosoma mansoni* -Induced Liver Fibrosis in Mice.**

**Veruska Cintia Alexandrino de Souza<sup>1</sup>, Danielle Maria Nascimento Moura<sup>1</sup>, Maria Carolina Accioly Brelaz de Castro<sup>2</sup>, Patrícia Torrez Bozza<sup>3</sup>, Ligia de Almeida Paiva<sup>3</sup>, Camila Juliet Barbosa Fernandes<sup>1</sup>, Renata Lins Carneiro Leão<sup>1</sup>, Jéssica Paula Lucena<sup>1</sup>, Roni Evencio de Araújo<sup>1</sup>, Alex José de Melo Silva<sup>1</sup>, Regina Celia Bressan Queiroz Figueiredo<sup>1</sup>, Sheilla Andrade de Oliveira<sup>1\*</sup>.**

## Supplementary information

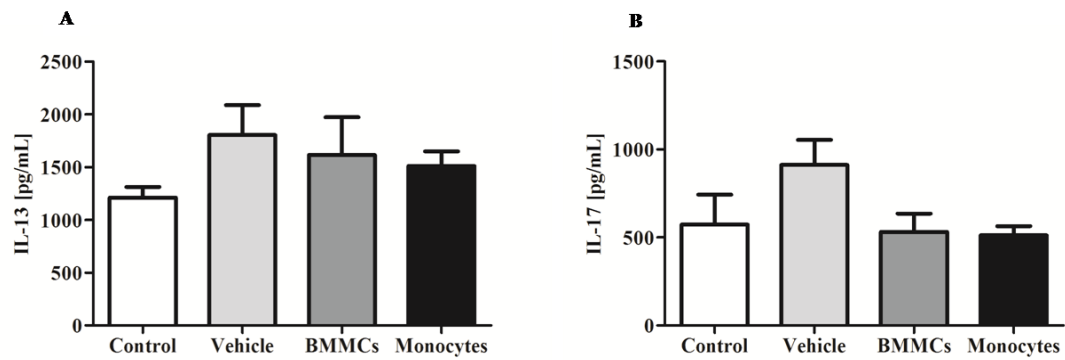

**Supplementary Figure S1. Evaluation of effects of Monocyte therapy in murine model of schistosomiasis.** (A) IL-13 and (B) IL-17 hepatic tissue levels, quantified by sandwich ELISA. (n=6 mice/group).

| <b>Gene</b>                    | <b>Sequence</b>                         |
|--------------------------------|-----------------------------------------|
| <b>CCL5</b>                    | Forward 5'-CCAGAGAAGAAGTGGGTTCAAG-3'    |
|                                | Reverse 5'-AGCAATGACAGGGAAGCTATAC-3'    |
| <b>IL-12<math>\beta</math></b> | Forward 5'-GTAACCAGAAAGGTGCGTTCC-3'     |
|                                | Reverse 5'-GAACACATGCCCACTTGCTG-3'      |
| <b>Arg-1</b>                   | Forward 5'-CCAGGGACTGACTACCTTAAAC-3'    |
|                                | Reverse 5'-GAAGGCGTTTGTCTAGTTCTG-3'     |
| <b>YM-1</b>                    | Forward 5'-ACCATGGCCAAGCTCATT-3'        |
|                                | Reverse 5'-GTCCTTAGCCCAACTGGTATAG-3'    |
| <b>CD206</b>                   | Forward 5'-GTTACCTGGAGTGATGGTTCTC-3'    |
|                                | Reverse 5'-GACATGCCAGGGTCACCTTT-3'      |
| <b>Fizz1</b>                   | Forward 5'-ACTTGCAACTGCCTGTGCTTAC-3'    |
|                                | Reverse 5'-TCAAAGCTGGGTTCTCCACCTC-3'    |
| <b>CCR2</b>                    | Forward 5'-CAAATCAAAGGAAATGGAAGACAAT-3' |
|                                | Reverse 5'-GCCCCTTCATCAAGCTCTTG-3'      |
| <b><math>\alpha</math>-SMA</b> | Forward 5'-TCAGGGAGTAATGGTTGGAATG-3'    |
|                                | Reverse 5'-GGTGATGATGCCGTGTTCTA-3'      |
| <b>TGF-<math>\beta</math>1</b> | Forward 5'-GGTGGTATACTGAGACACCTTG-3'    |
|                                | Reverse 5'-CCCAAGGAAAGGTAGGTGATAG-3'    |
| <b>Gal-3</b>                   | Forward 5'-CTGAGAGATACCCATCGCTTTG-3'    |
|                                | Reverse 5'-GTAGCTCAGTGAGAGAACACTT-3'    |
| <b>B-actina</b>                | Forward 5'-CCGTAAAGACCTCTATGCCAAC-3'    |
|                                | Reverse 5'-AGGAGCCAGAGCAGTAATC-3'       |

**Supplementary Table S1. Sequence of murine primers used for quantitative real time polymerase chain reaction (qPCR).** Abbreviations: Arg, arginase; Gal, galectin.
